# Supplementary material for: Synthesis and characterization of new coordination compounds by the use of 2-pyridinemethanol and di- or tricarboxylic acids
Source: Royal Society of Chemistry journal article supplement (doi:10.1039/d1ce00659b), 2021-01-01
Supplement: d1ce00659b1.pdf [file d1ce00659b1.pdf]

## SUPPORTING MATERIAL

# Synthesis and Characterization of New Coordination Compounds by the Use of 2-Pyridinemethanol and Di- or Tricarboxylic Acids

Ioannis Mylonas-Margaritis,<sup>a</sup> Júlia Mayans,<sup>b</sup> Wenming Tong,<sup>c</sup> Pau Farràs,<sup>c</sup> Albert  
Escuer,<sup>d</sup> Patrick McArdle,<sup>a</sup> and Constantina Papatriantafyllopoulou \*<sup>a</sup>

---

<sup>a.</sup> School of Chemistry, College of Science and Engineering, National University of Ireland Galway, H91 TK 33 Galway, Ireland; E-mail address: [constantina.papatriantafyllopo@nuigalway.ie](mailto:constantina.papatriantafyllopo@nuigalway.ie); Tel: +353 91 493462

<sup>b.</sup> Instituto de Ciencia Molecular (ICMol), Universidad de Valencia, Catedrático José Beltrán 2, 46980 Paterna (Valencia), Spain

<sup>c.</sup> School of Chemistry, Energy Research Centre, Ryan Institute, National University of Ireland, Galway (NUI Galway), University Road, H91 CF50 Galway, Ireland

<sup>d.</sup> Departament de Química Inorgànica i Orgànica, Secció Inorgànica and Institute of Nanoscience (IN2UB) and Nanotechnology, Universitat de Barcelona, Martí i Franques 1-11, Barcelona-08028, Spain.

---

Table S1. Selected interatomic distances (Å) and angles (°) for 1.

| Bonds     |         |           |         |
|-----------|---------|-----------|---------|
| Co1-N1    | 2.115   | Co1-O1    | 2.168   |
| Co1-O2    | 2.043   |           |         |
| Angles    |         |           |         |
| N1-Co1-O2 | 96.5(1) | N1-Co1-O1 | 90.2(4) |
| N1-Co1-O1 | 77.1(2) | N1-Co1-O2 | 95.7(5) |

Table S2. Selected interatomic distances (Å) and angles (°) for 2.

| Bonds     |       |           |       |
|-----------|-------|-----------|-------|
| Ni1-O1    | 2.104 | Ni1-O2    | 2.040 |
| Ni1-N1    | 2.058 |           |       |
| Angles    |       |           |       |
| O1-Ni1-O2 | 92.91 | O2-Ni1-O2 | 86.78 |
| O1-Ni1-N1 | 79.82 | O2-Ni1-N1 | 94.50 |
| O1-Ni1-O1 | 87.97 | O2-Ni1-N1 | 95.15 |
| O1-Ni1-N1 | 90.58 |           |       |

Table S3. Selected interatomic distances (Å) and angles (°) for 3.

| Bonds     |       |           |       |
|-----------|-------|-----------|-------|
| Ni1-O2    | 2.058 | Ni1-N1    | 2.052 |
| Ni1-O1    | 2.085 |           |       |
| Angles    |       |           |       |
| O1-Ni1-O2 | 92.48 | N1-Ni1-O2 | 92.88 |
| O2-Ni1-O1 | 87.52 | N1-Ni1-O1 | 99.75 |
| N1-Ni1-O1 | 80.25 | N1-Ni1-O2 | 87.12 |

Table S4. Selected interatomic distances (Å) and angles (°) for 4.

| Bonds     |          |           |          |
|-----------|----------|-----------|----------|
| Zn1 - N2  | 2.130(3) | Zn2 - O5  | 1.957(5) |
| Zn1 - O6  | 2.010(5) | Zn2 - O1  | 1.906(4) |
| Zn1 - O3  | 2.137(3) | Zn2 - O6  | 1.915(4) |
| Zn1 - O1  | 2.012(4) | Zn2 - O2  | 1.960(5) |
| Zn1 - O4  | 2.149(3) |           |          |
| Angles    |          |           |          |
| O4-Zn1-O1 | 92.8(2)  | N2-Zn1-O4 | 89.8(1)  |
| O4-Zn1-O6 | 92.1(1)  | O2-Zn2-O5 | 103.6(2) |
| O6-Zn1-O1 | 173.0(2) | O5-Zn2-O1 | 112.4(2) |
| O3-Zn1-O6 | 93.8(2)  | O1-Zn2-O6 | 116.7(2) |
| O3-Zn1-O4 | 91.6(1)  | O6-Zn2-O2 | 111.8(2) |
| O3-Zn1-O1 | 91.0(2)  | O2-Zn2-O1 | 107.8(2) |
| N2-Zn1-O6 | 78.5(2)  | O5-Zn2-O6 | 103.9(2) |
| N2-Zn1-O1 | 96.6(2)  |           |          |

Table S5. Selected interatomic distances (Å) and angles (°) for 5.

| Bonds     |          |           |          |
|-----------|----------|-----------|----------|
| Fe1-O6    | 2.149(4) | Fe2-O2    | 2.089(0) |
| Fe1-O1    | 2.073(3) | Fe2-O3    | 1.969(9) |
| Fe1-O4    | 2.187(7) | Fe2-O6    | 2.321(9) |
| Fe2-O7    | 2.314(6) | Fe2-O5    | 2.121(2) |
| Fe2-N1    | 2.166(8) |           |          |
| Angles    |          |           |          |
| O6-Fe1-O4 | 92.23    | O3-Fe2-O5 | 158.72   |
| O6-Fe1-O4 | 87.07    | O2-Fe2-O6 | 99.08    |
| O6-Fe1-O1 | 89.64    | O2-Fe2-N1 | 98.15    |
| O6-Fe1-O1 | 90.36    | O2-Fe2-O5 | 96.99    |
| O4-Fe1-O1 | 90.46    | N1-Fe2-O5 | 87.62    |
| O4-Fe1-O1 | 89.54    | N1-Fe2-O7 | 76.92    |
| O3-Fe2-O6 | 100.74   | O5-Fe2-O7 | 87.32    |
| O3-Fe2-O2 | 85.88    | O7-Fe2-O6 | 87.48    |
| O3-Fe2-N1 | 112.94   | O6-Fe2-O2 | 99.08    |
| 3-Fe2-O7  | 91.93    |           |          |

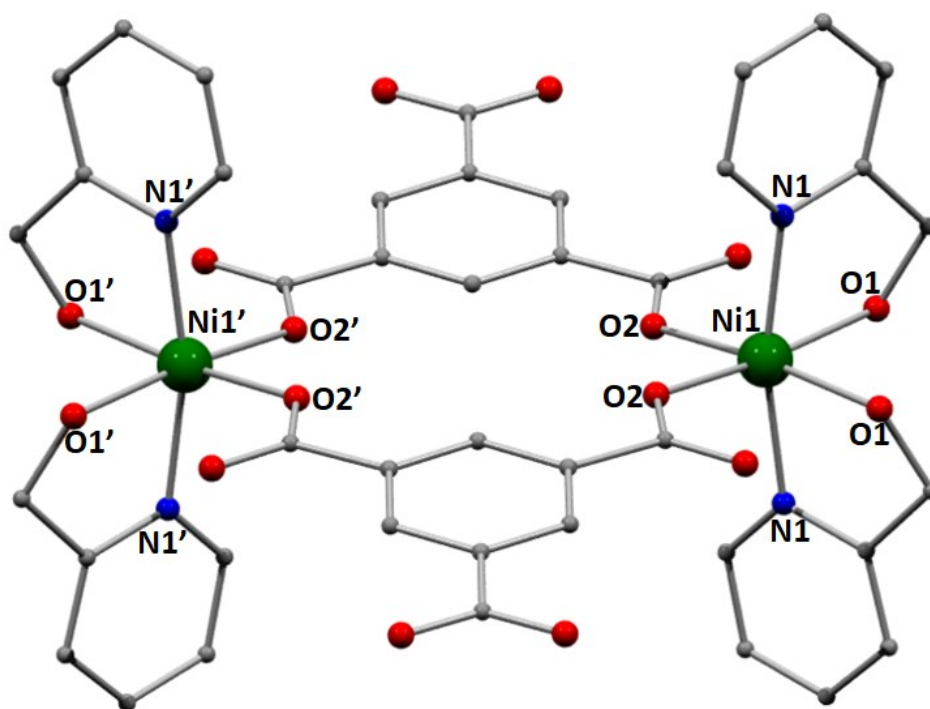

Fig. S1. Representation of the molecular structure of 2·DMF. Color code: Ni<sup>II</sup>, purple; N, navy blue; O, red; C, grey. The hydrogen atoms and the solvate molecules are omitted for clarity.

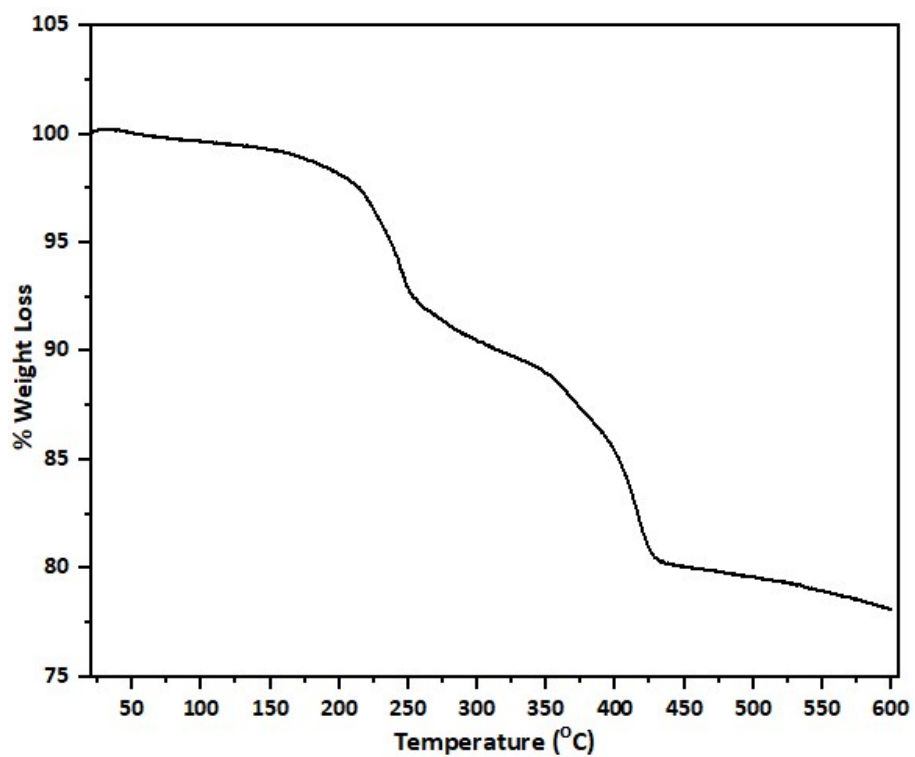

Figure S2. The TGA diagram for 1.

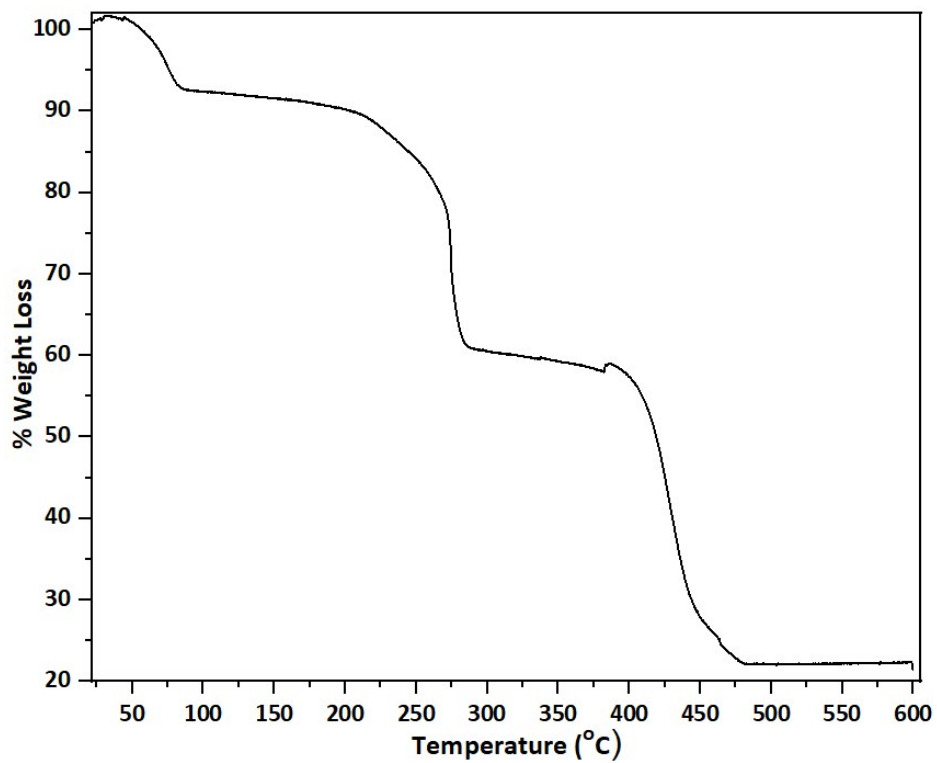

Figure S3. The TGA diagram for 3.

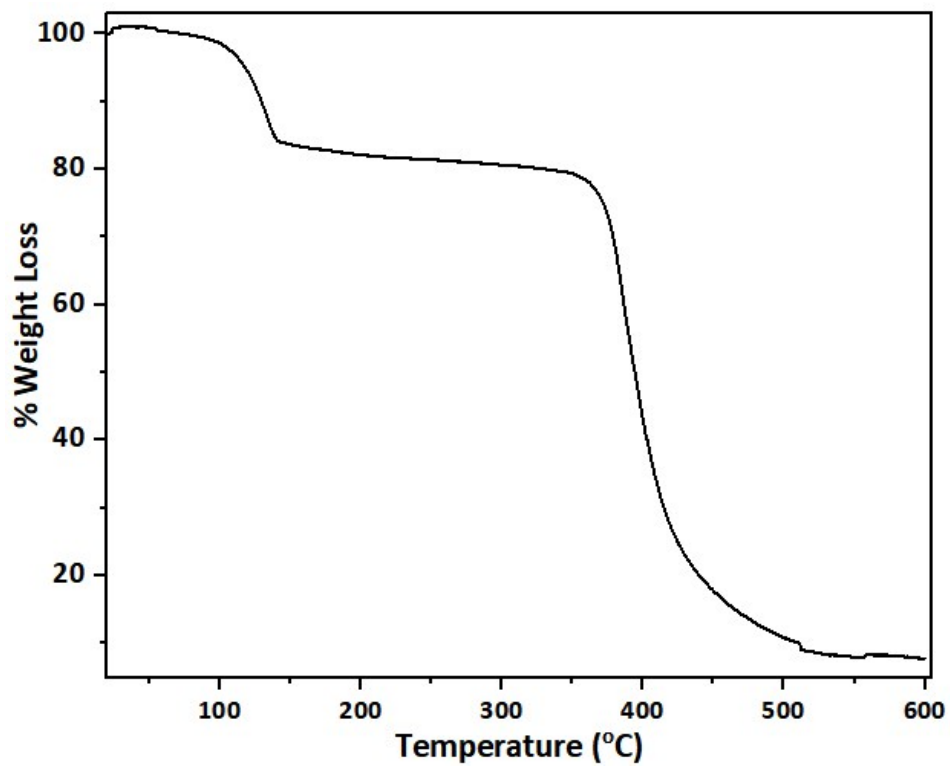

Figure S4. The TGA diagram for 4-DMF.

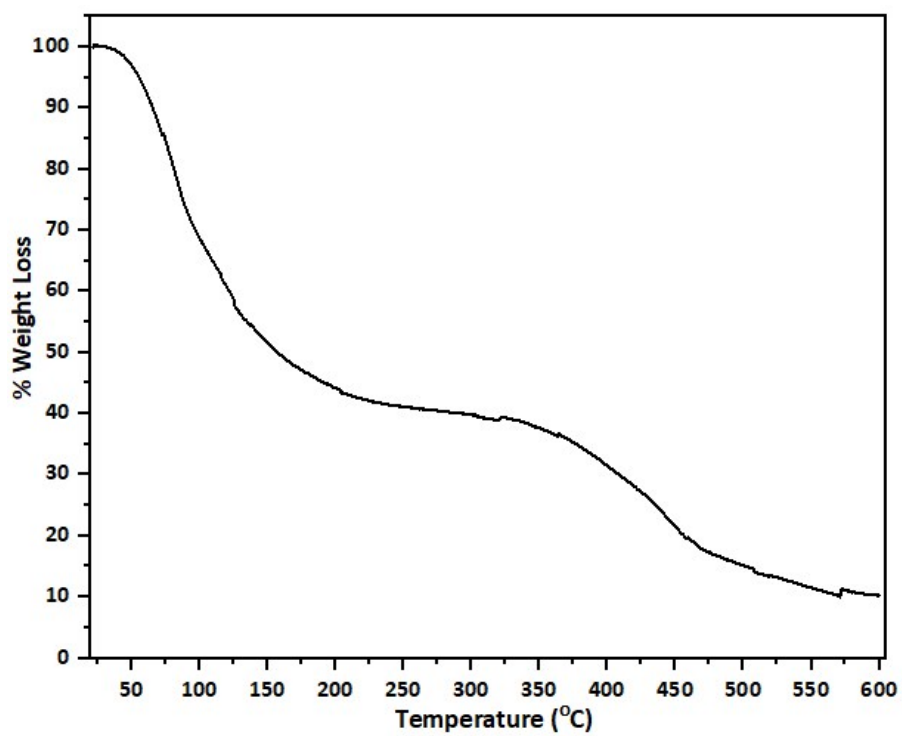

Figure S5. The TGA diagram for 5.

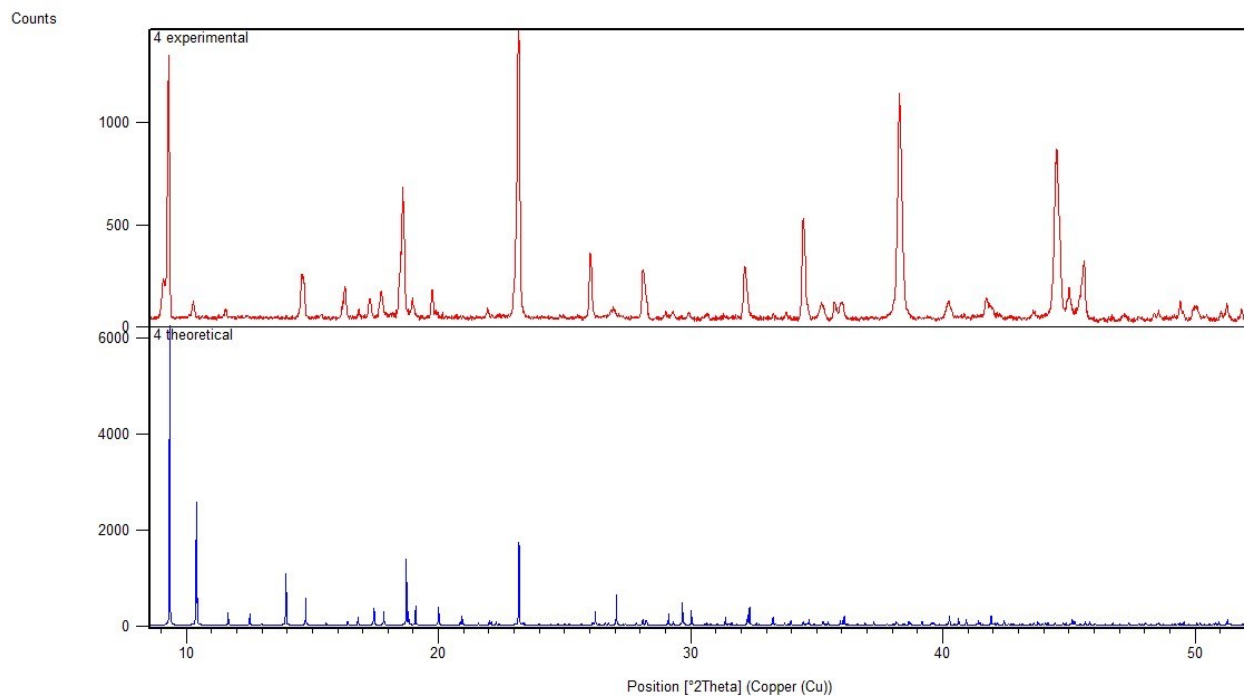

Figure S6. Comparison of the paxrd patterns for 4-DMF (theoretical, blue; experimental, red).

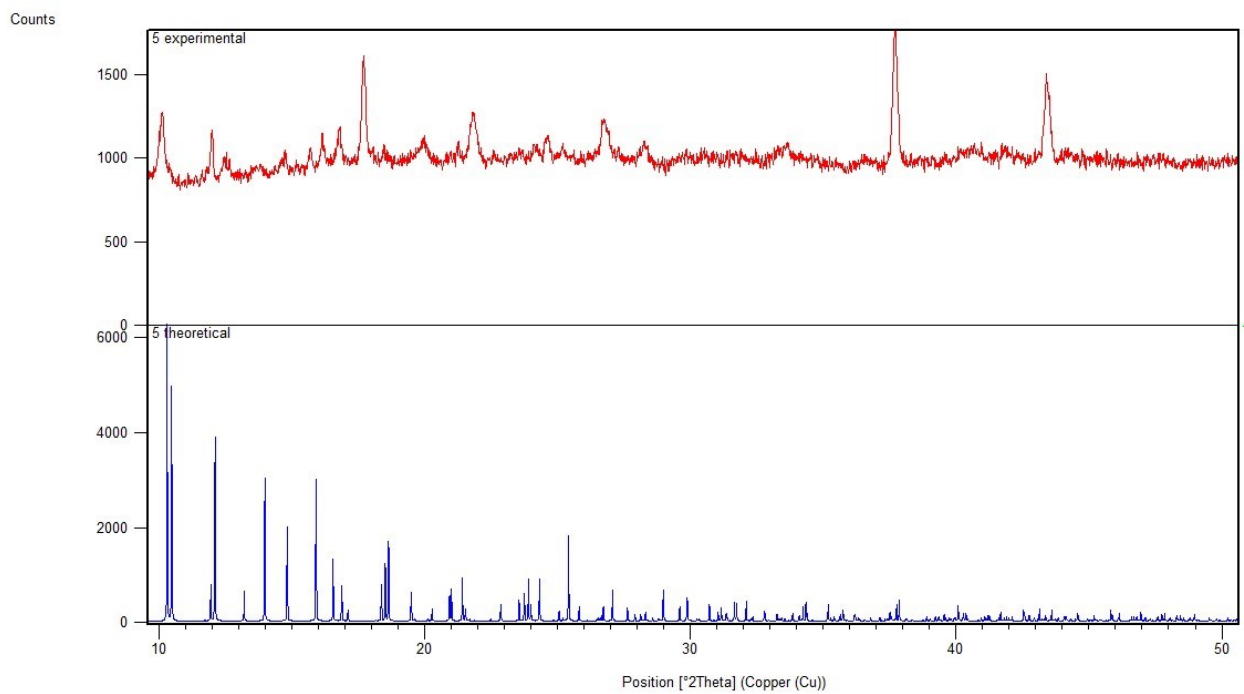

Figure S7. Comparison of the paxrd patterns for 5 (theoretical, blue; experimental, red).
